# Supplementary material
Source: PubMed Central journal article supplement (PMC2801808)
Supplement: NIHMS167152-supplement-1.pdf [file NIHMS167152-supplement-1.pdf]

## **Supporting Information**

Identification and Optimization of a Novel Inhibitor of Mitochondrial Calpain 10

Kyle A. Rasbach<sup>†</sup>, David D. Arrington<sup>†</sup>, Sina Odejinmi, Chris Giguere, Craig C. Beeson,  
and Rick G. Schnellmann (<sup>†</sup> Denotes an equal contribution to the completion of this work)

**Contents:** Analytical Purity of Compounds

| Peptide                      | Mass (amu) expected | Mass (amu), found (M + H) <sup>+</sup> | R.T.              | R.T.              |
|------------------------------|---------------------|----------------------------------------|-------------------|-------------------|
| KAGYC-s-s-CYGAK <sup>a</sup> | 1077.5              | 1077.8                                 | 17.5 <sup>d</sup> | 20.0 <sup>e</sup> |
| CYGRKK <sup>b</sup>          | 753.9               | 753.2                                  |                   |                   |
| CYGRK <sup>b</sup>           | 625.8               | 625.4                                  |                   |                   |
| CYGAK <sup>b</sup>           | 540.4               | 540.7                                  |                   |                   |
| YGAK <sup>c</sup>            | 437.2               | 437.3                                  |                   |                   |
| C'YGAK <sup>c</sup>          | 554.4               | 554.5                                  |                   |                   |
| CVGAK <sup>b</sup>           | 476.6               | 476.3                                  |                   |                   |
| MeOPh-s-s-CYGAK <sup>c</sup> | 678.3               | 678.5                                  | 22.0 <sup>f</sup> | 28.0 <sup>g</sup> |
| Ethyl-s-s-CYGAK <sup>c</sup> | 600.3               | 600.2                                  | 18 <sup>f</sup>   | 21 <sup>g</sup>   |
| CAGAK <sup>b</sup>           |                     |                                        |                   |                   |

<sup>a</sup>CYGAK dimer was analyzed for purity by two different HPLC methods and a single symmetric peak was detected in each case (purity > 98%). <sup>d</sup>Alltec Platinum C18 100A 3 $\mu$ , 33mm X 7mm, 0.7 mL/min, 4% acetonitrile/96% water + 0.1% TFA, linear gradient to 50% acetonitrile/50% water + 0.1% TFA after 50 min and then 100% acetonitrile/0% water after 60 min, U.V. detection at 220 nm. <sup>e</sup>4% methanol/96% water + 0.1% TFA, linear gradient to 30% methanol/70% water + 0.1% TFA after 15 min and then 100% methanol/0% water after 30 min, U.V. detection at 220 nm. <sup>f</sup>4% acetonitrile/96% water + 0.1% TFA, linear gradient to 60% acetonitrile /40% water + 0.1% TFA after 30 min and then 100% acetonitrile /0% water after 45 min, U.V. detection at 220 nm. <sup>g</sup>4% methanol/96% water + 0.1% TFA, linear gradient to 60% methanol/40% water + 0.1% TFA after 30 min and then 100% methanol/0% water after 45 min, U.V. detection at 220 nm.

<sup>b</sup>These peptides were obtained from commercial sources (purity > 90%). <sup>c</sup>

These peptides were prepared in the laboratory and each purified twice on Prep LC column (purity > 95%).
